# Supplementary material for: Metabolite Biomarkers of Prolonged and Intensified Pain and Distress in Head and Neck Cancer Patients Undergoing Radio- or Chemoradiotherapy by Means of NMR-Based Metabolomics—A Preliminary Study
Source: MDPI journal article supplement (doi:10.3390/metabo14010060), 2024-01-17
Supplement: s1 [file s1]

Supplementary material for:

# **Metabolite biomarkers of prolonged and intensified pain and distress in head and neck cancer patients undergoing radio- or chemoradiotherapy by means of NMR based metabolomics – a preliminary study**

**Łukasz Boguszewicz <sup>1,\*</sup>, Alicja Heyda <sup>2</sup>, Mateusz Ciszek <sup>1</sup>, Agata Bielen <sup>2</sup>, Agnieszka Skorupa <sup>1</sup>, Jolanta Mrochem-Kwarciak <sup>3</sup>, Krzysztof Skłodowski <sup>2</sup> and Maria Sokół <sup>2</sup>**

<sup>1</sup> Department of Medical Physics, Maria Skłodowska-Curie National Research Institute of Oncology, Gliwice Branch, 44-102 Gliwice, Poland; mateusz.ciszek@gliwice.nio.gov.pl (M.C.); agnieszka.skorupa@gliwice.nio.gov.pl (A.S.)

<sup>2</sup> 1st Radiation and Clinical Oncology Department, Maria Skłodowska-Curie National Research Institute of Oncology, Gliwice Branch, 44-102 Gliwice, Poland; alicja.heyda@gliwice.nio.gov.pl (A.H.); agata.bielen@gliwice.nio.gov.pl (A.B.); krzysztof.sklodowski@gliwice.nio.gov.pl (K.S.); maria.sokol@gliwice.nio.gov.pl (M.S.)

<sup>3</sup> Analytics and Clinical Biochemistry Department, Maria Skłodowska-Curie National Research Institute of Oncology, Gliwice Branch, 44-102 Gliwice, Poland; jolanta.mrochem-kwarciak@gliwice.nio.gov.pl

\* Correspondence: lukasz.boguszewicz@gliwice.nio.gov.pl

### The characteristics of the acquired spectra as well as the pulse sequence parameters

NOESY (Nuclear Overhauser Effect Spectroscopy) – an overview of all types of molecules.

CPMG (Carr-Purcell-Meiboom-Gill) – an information on only low molecular weight metabolites.

DIFF (diffusion edited) - mainly macromolecular signals.

Two dimensional (2D) JRES (J-resolved) – a visualization of scalar couplings and improved metabolite identification.

**Table S1.** NMR pulse sequence parameters.

| Pulse program       | NOESYGPPR1D | CPMGPR1D | LEDBPGPPR2S1D | JRESGPPRQF |
|---------------------|-------------|----------|---------------|------------|
| <b>TD</b>           | 65536       | 65536    | 65536         | 8192       |
| <b>SW</b> [ppm]     | 30          | 20       | 30            | 16.62      |
| <b>AQ</b> [sec]     | 2.73        | 4.09     | 2.73          | 0.62       |
| <b>D1</b> [sec]     | 4           | 4        | 4             | 2          |
| <b>D8</b> [sec]     | 0.01        | -        | -             | -          |
| <b>D16</b> [sec]    | -           | -        | 0.0002        | 0.0002     |
| <b>D20</b> [sec]    | -           | 0.0003   | 0.12          | -          |
| <b>D21</b> [sec]    | -           | -        | 0.005         | -          |
| <b>DS</b>           | 4           | 4        | 4             | 16         |
| <b>L4</b>           | -           | 126      | -             | -          |
| <b>NS</b>           | 32          | 64       | 64            | 1          |
| <b>DELTA1</b> [sec] | -           | -        | 0.11572488    | -          |
| <b>DELTA2</b> [sec] | -           | -        | 0.004172      | -          |

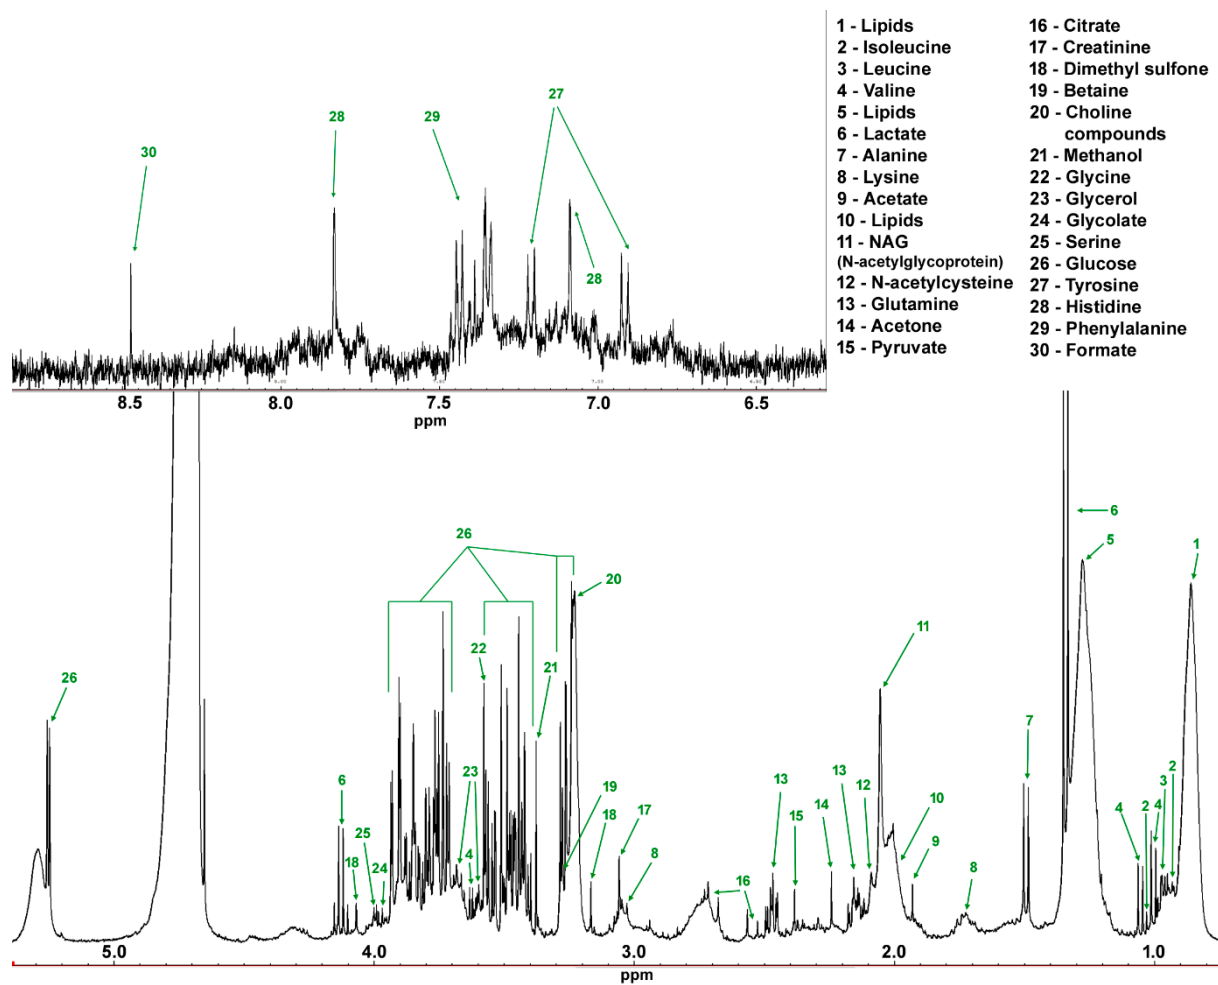

**Figure S1.** The 400 MHz  $^1\text{H}$ -NMR CPMG spectrum of blood serum from HNSCC patient treated with chemoradiotherapy. Main metabolites are indicated.

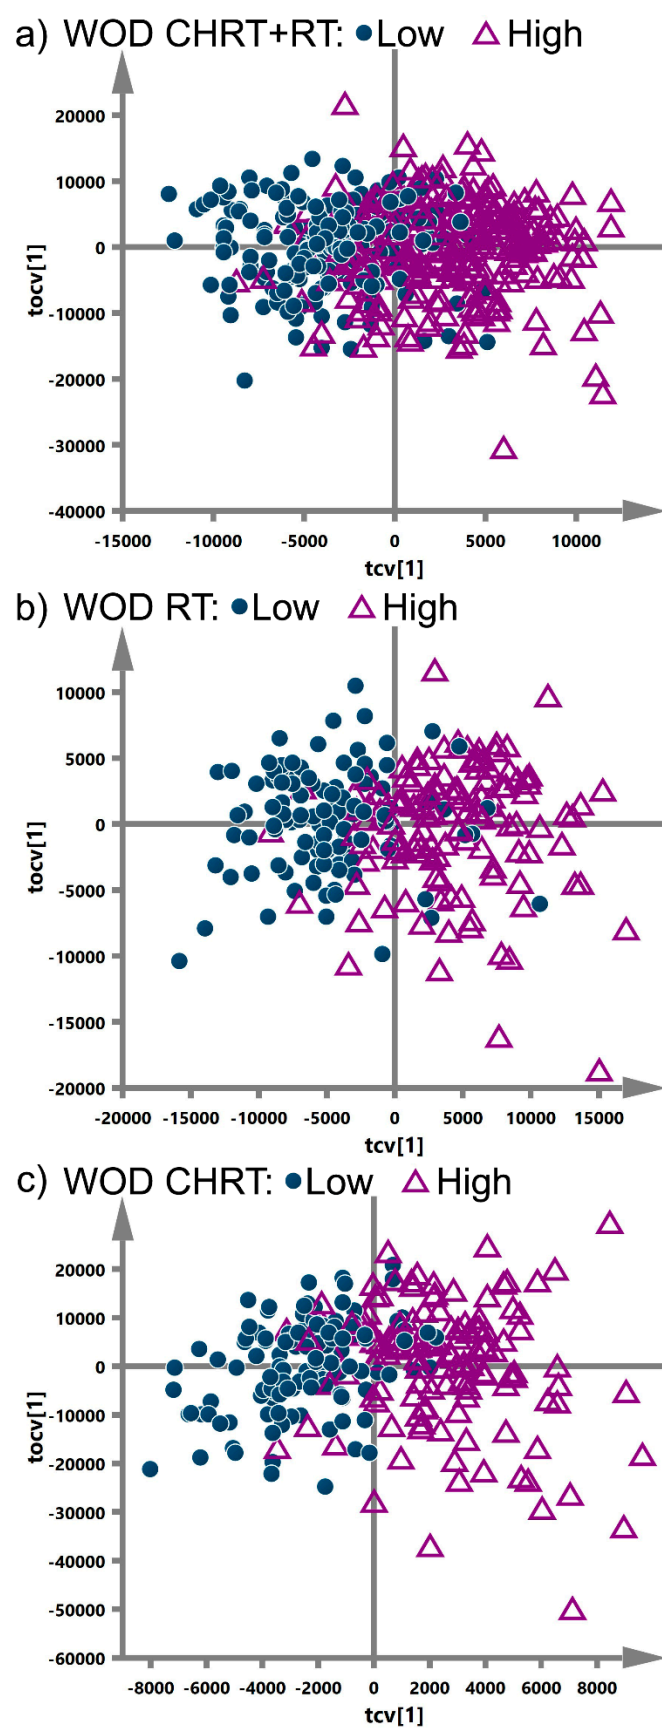

**Figure S2.** Multivariate discrimination between the L (Low) and H (High) WOD classes for CHRT+RT (a), RT (b) and CHRT (c). The OPLS-DA cross-validated scores plots show distinct separation between the classes.

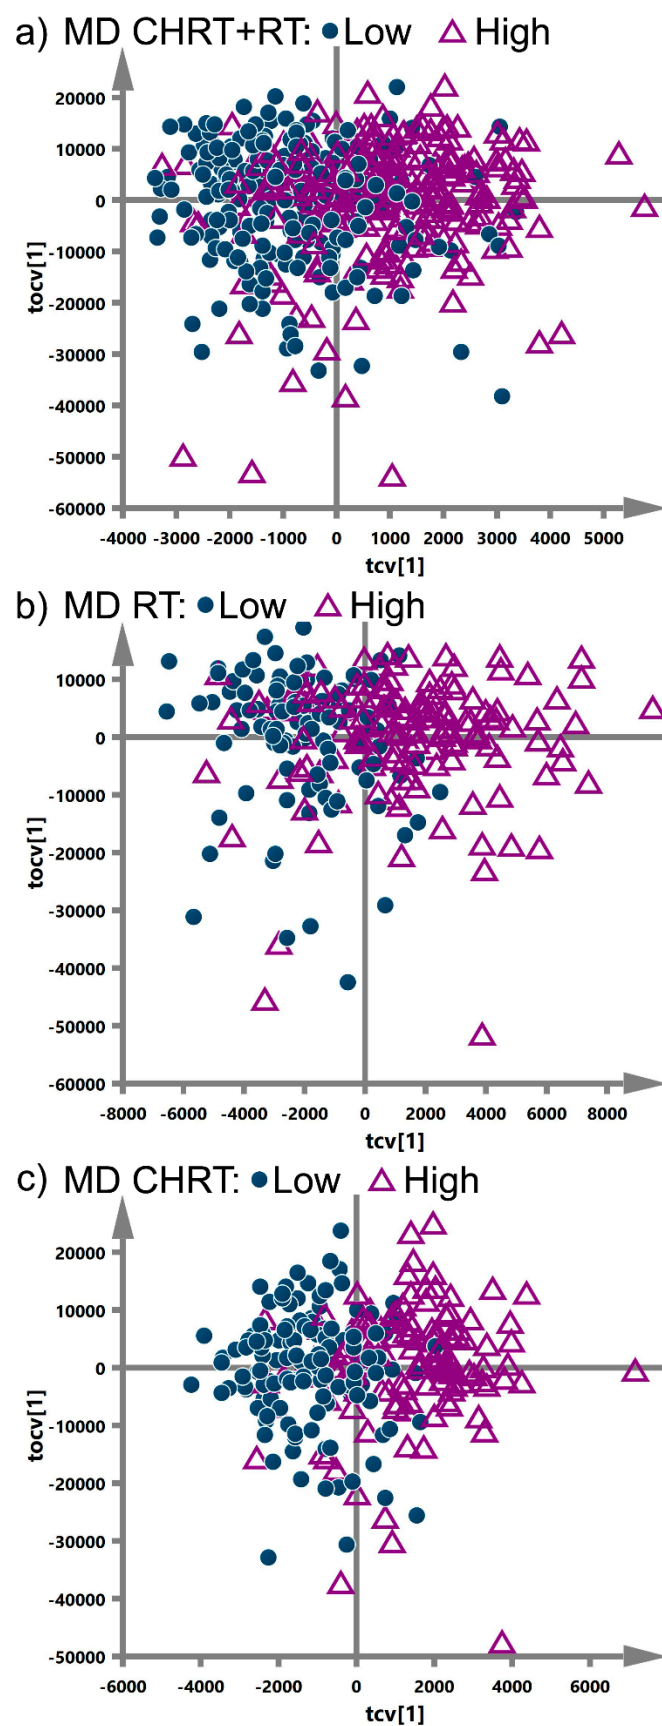

**Figure S3.** Multivariate discrimination between the L (Low) and H (High) MD classes for CHRT+RT (a), RT (b) and CHRT (c). The OPLS-DA cross-validated scores plots show moderate to distinct separation between the classes.

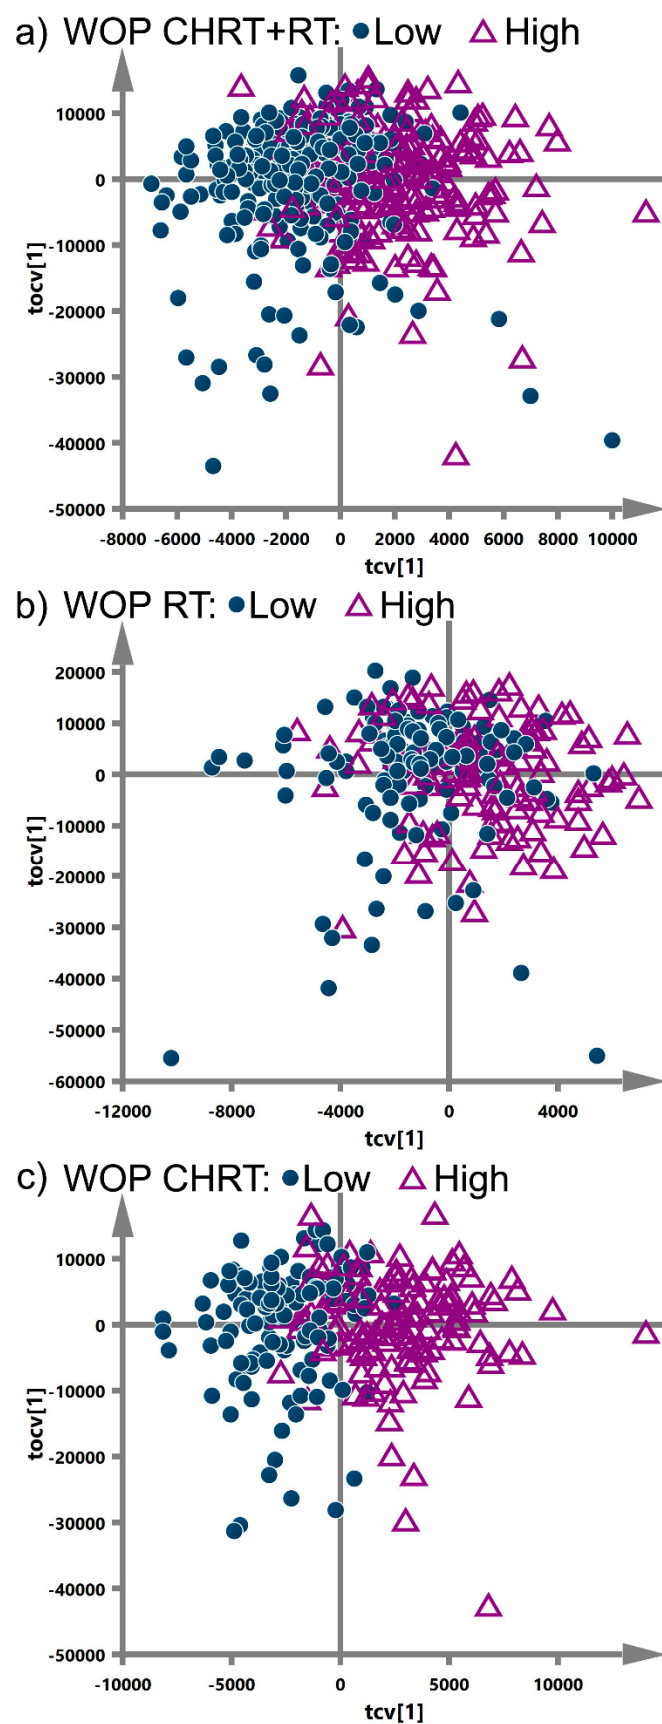

**Figure S4.** Multivariate discrimination between the L (Low) and H (High) WOP classes for CHRT+RT (a), RT (b) and CHRT (c). The OPLS-DA cross-validated scores plots show moderate to distinct separation between the classes.

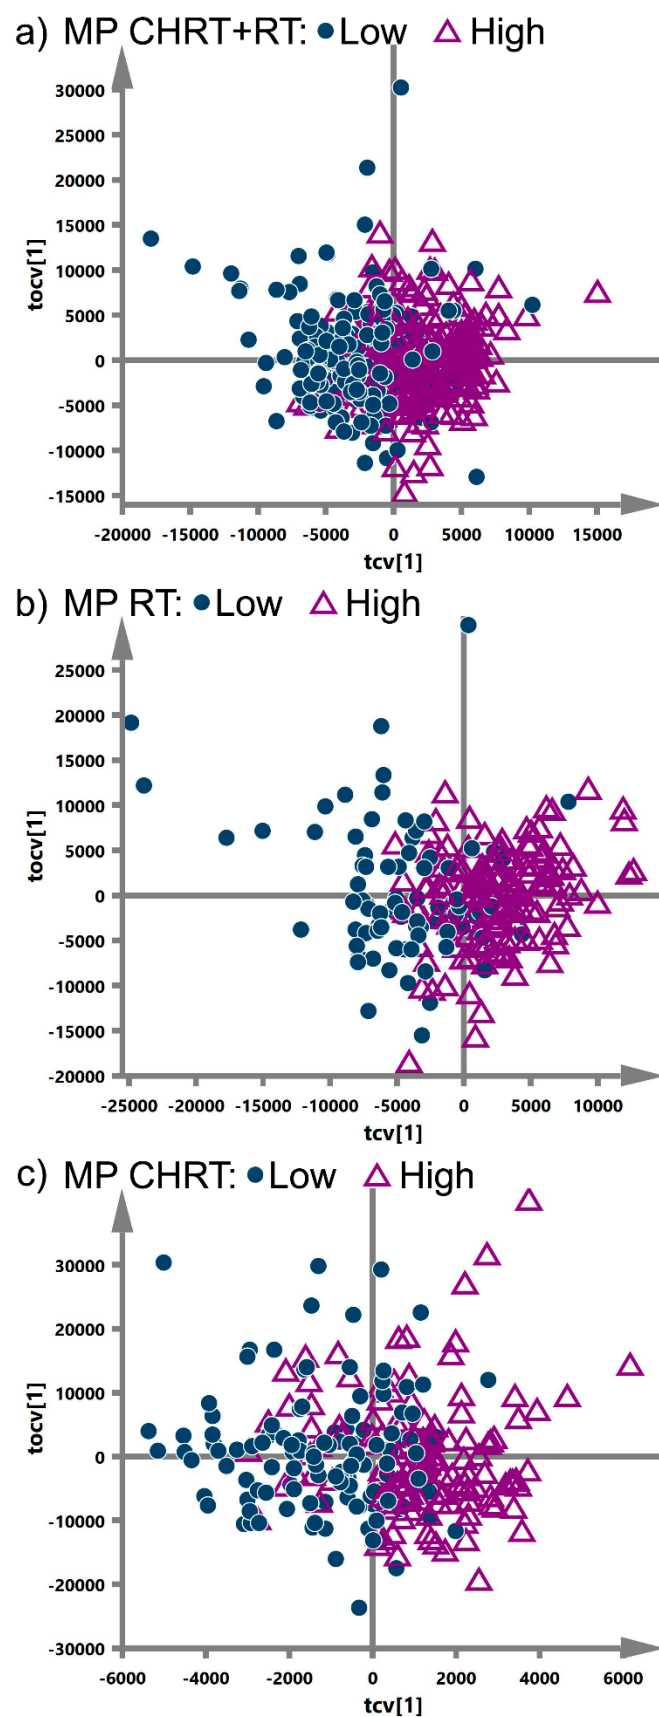

**Figure S5.** Multivariate discrimination between the L (Low) and H (High) MP classes for CHRT+RT (a), RT (b) and CHRT (c). The OPLS-DA cross-validated scores plots show only moderate separation between the classes.
